# Supplementary material for: Tectonic evolution of the Indio Hills segment of the San Andreas fault in southern California
Source: Copernicus journal article supplement (doi:10.5194/se-2022-9), 2022-02-02
Supplement: Supplementary file [file se-2022-9_references_Matti.pdf › se-2022-9_references_Matti.pdf]

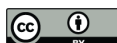

777 **References**

- 778 **Allen, C. R.:** San Andreas fault zone in San Gorgonio Pass, southern California, GSA Bull.,  
 779 68, 315–360, 1957.
- 780 **Atwater, T. and Stock, J.:** Pacific-North America Plate Tectonics of the Neogene  
 781 Southwestern United States: An Update, International Geology Review, 40:5, 375–  
 782 402, 1998.
- 783 **Babcock, E. A.:** Structural Geology and Geophysics of the Durmid Area, Imperial Valley,  
 784 California, Ph.D. Thesis, University of California, Riverside, 149 pp., 1969.
- 785 **Babcock, E. A.:** Geology of the northeast margin of the Salton Trough, Salton Sea, California,  
 786 GSA Bull., 85, 321–332, 1974.
- 787 **Bergh, S. G., Braathen, A. and Andresen, A.:** Interaction of basement-involved and thin-skinned  
 788 tectonism in the tertiary fold-and thrust belt of Central Spitsbergen, Svalbard, AAPG  
 789 Bull., 81, 637–661, 1997.
- 790 **Bergh S. G., Sylvester, A. G., Damte, A. and Indrevær, K.:** Evolving transpressional strain  
 791 fields along the San Andreas fault in southern California: implications for fault  
 792 branching, fault dip segmentation and strain partitioning, Geophys. Res. Abs., 16, EGU  
 793 General Assembly, 24<sup>th</sup> April–2<sup>nd</sup> May, Vienna, Austria, 2014.
- 794 **Bergh, S. G., Sylvester, A. G., Damte, A. and Indrevær, K.:** Polyphase kinematic history of  
 795 transpression along the Mecca Hills segment of the San Andreas fault, southern  
 796 California, Geosphere, 15, 34 pp., 2019.
- 797 **Bilham, R. and Williams, P.:** Sawtooth segmentation and deformation processes on the  
 798 southern San Andreas fault, California, Geophys. Res. Lett., 12, 9, 557–560, 1985.
- 799 **Blisniuk, K., Scharer, K., Sharp, W. D., Burgmann, R., Amos, C. and Rymer, M.:** A revised  
 800 position for the primary strand of the Pleistocene-Holocene San Andreas fault in  
 801 southern California, Sci. Adv., 7, eaaz5691, 2021.
- 802 **Boley, J.-L., Stimac, J. P., Weldon II, R. J. and Rymer, M. J.:** Stratigraphy and paleomagnetism  
 803 of the Mecca and Indio Hills, southern California, in: Geological Investigations of an  
 804 Active Margin, edited by: McGill, S. F. and Ross, T. M., GSA, Cordilleran Section  
 805 Guidebook, 27<sup>th</sup> Annual Meeting, San Bernardino County Museum Associations, USA,  
 806 336–344, 1994.
- 807 **Braathen, A., Bergh, S. G. and Maher Jr., H. D.:** Application of a critical wedge taper model to  
 808 the Tertiary transpressional fold-and thrust belt on Spitsbergen, Svalbard, GSA Bull.,  
 809 111, 1468–1485, 1999.



- 810 **Bürgmann, R.:** Transpression along the southern San Andreas fault, Durmid Hills, California,  
 811 Tectonics, 10, 1152–1163, 1991.
- 812 **Chang, S.-B. R., Allen, C. R. and Kirschvink, J. L.:** Magnetic stratigraphy and a test for block  
 813 rotation of sedimentary rocks within the San Andreas fault zone, Mecca Hills,  
 814 southeastern California, Quat. Res., 27, 30–40, 1987.
- 815 **Dair, L. and Cooke, M. L.:** San Andreas fault geometry through the San Geronio Pass,  
 816 California, Geology, 37, 2, 119–122, 2009.
- 817 **Damte, A.:** Styles of deformation in zones of oblique convergence: Examples from the Mecca  
 818 Hills, southern San Andreas fault, Unpublished Ph.D. thesis, University of California,  
 819 Santa Barbara, 164 pp., 1997.
- 820 **Davis, G. H.:** Structural geology of the Colorado Plateau region of southern Utah, with  
 821 emphasis on deformation bands, GSA Spec. Pap., 342, 157 pp., 1999.
- 822 **Di Toro, G., Han, R., Hirose, T., De Paola, N., Nielsen, S., Mizoguchi, K., Ferri, F., Cocco,**  
 823 **M. and Shimamoto, T.:** Fault lubrication during earthquakes, Nature, 471, 494–498,  
 824 2011.
- 825 **Dibblee, T. W. Jr.:** Geology of the Imperial Valley, California, Californian Division of Mines  
 826 Bulletin, 170, 21–28, 1954.
- 827 **Dibblee, T. W. Jr.:** Geology of the southeastern San Andreas fault zone in the Coachella  
 828 Valley area, Southern California, in: Southern San Andreas fault, Whitewater to  
 829 Bombay Beach, Salton Trough, California, edited by: Baldwin, J., Lewis, L., Payne,  
 830 M. and Rocquemore, G., South Coast Geological Society, Annual Field Trip Guide  
 831 Book, 25, 35–56, 1997.
- 832 **Dibblee, T. W. Jr. and Minch, J. A.:** Geological map of the Thousand Palms & Lost Horse  
 833 Mountain 15 minutes quadrangles, Riverside County, California, Dibblee Foundation,  
 834 Map DF-372, 2008.
- 835 **Dokka, R. K. and Travis, C. J.:** Late Cenozoic strike-slip faulting in the Mojave Desert,  
 836 California, Tectonics, 9, 311–340, 1990a.
- 837 **Dokka, R. K. and Travis, C. J.:** Role of the Eastern California Shear Zone in accommodating  
 838 Pacific-North American plate motion, Geophys. Res. Lett., 17, 1323–1326, 1990b.
- 839 **Dorsey, R. J., Housen, B. A., Janecke, S. U., Fanning, C. M. and Spears, A. L. F.:**  
 840 Stratigraphic record of basin development within the San Andreas fault system: Late  
 841 Cenozoic Fish Creek–Vallecito basin, southern California, GSA Bull., 123, 5/6, 771–  
 842 793, 2011.

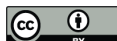

- 843 **Du, Y. and Aydin, A.:** Is the San Andreas big bend responsible for the Landers earthquake and  
 844 the eastern California shear zone, *Geology*, 24, 3, 219–222, 1996.
- 845 **Fagereng, Å. and Beall, A.:** Is complex fault zone behavior a reflection of rheological  
 846 heterogeneity, *Phil. Trans. R. Soc. A329*: 20190421, 2021.
- 847 **Fattaruso L.A., M.L. Cooke & R.J. Dorsey,** 2014. Sensitivity of uplift patterns to dip of the San  
 848 Andreas fault in the Coachella Valley, California. *Geosphere*, vol. 10, pp. 1.12.
- 849 **Fuis, G. S., Scheirer, D. S., Langenheim, V. E. and Kohler, M. D.:** A New Perspective on the  
 850 Geometry of the San Andreas Fault in Southern California and Its Relationship to  
 851 Lithospheric Structure, *BSSA*, 102, 236–251, 2012.
- 852 **Fuis G. S., Bauer, K., Goldman, M. R., Ryberg, T., Langenheim, V. E., Scheirer, D. S.,**  
 853 **Rymer, M. J., Stock, J. M., Hole, J. A., Catchings, R. D., Graves, R. W. and Aagaard,**  
 854 **B.:** Subsurface Geometry of the San Andreas Fault in Southern California: Results  
 855 from the Salton Seismic Imaging Project (SSIP) and Strong Ground Motion  
 856 Expectations, *BSSA*, 107, 4, 1642–1662, 2017.
- 857 **Guest, B., Niemi, N. and Wernicke, B.:** Stateline fault system: A new component of the  
 858 Miocene-Quaternary Eastern California shear zone, *GSA Bull.*, 119, 11/12, 1337–  
 859 1346, 2007.
- 860 **Hardebeck J.L. & E. Hauksson.** 1999. Role of fluids in faulting inferred from stress field  
 861 signatures. *Science*, 285, pp. 236–239.
- 862 **Hauksson, E., Yang, W. and Schearer, P. M.:** Waveform Relocated Earthquake Catalog for  
 863 Southern California (1981 to June 2011), *BSSA*, 102, 5, 2239–2244, 2012.
- 864 **Hernandez Flores, A. P.:** Paleosismologia del sistema de fallas imbricado en la Sierra  
 865 Cucapah, Baja California, Mexico, Master's Thesis, Centre for Scientific Research and  
 866 Higher Education, Ensenada, Mexico, 254 pp., 2015.
- 867 **Herzig, C. T., Mehegan, J. M. and Stelting, C. E.:** **Lithostratigraphy of the State 2-14**  
 868 **Borehole: Salton Sea Scientific Drilling Project,** *J. Geophys. Res.*, 93, B11, 12969–  
 869 12980, 1988.
- 870 **Janecke, S. U., Markowski, D. K., Evans, J. P., Persaud, P. and Kenney, M.:** Durmid ladder  
 871 structure and its implications for the nucleation sites of the next  $M > 7.5$  earthquake on  
 872 the San Andreas fault or Brawley seismic zone in southern California, *Lithosphere*, 10,  
 873 5, 602–631, 2018.
- 874 **Keller, E. A., Bonkowski, M. S., Korsch, R. J. and Schlemon, R. J.:** Tectonic geomorphology  
 875 of the San Andreas fault zone in the southern Indio Hills, Coachella Valley, California,  
 876 *GSA Bull.*, 93, 46–56, 1982.

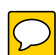

- 877 Kirby, S. M., Janecke, S. U., Dorsey, R. J., Housen, B. A., Langenheim, V. E., McDougall, K.  
 878 A. and Steely, A. N.: Pleistocene Brawley and Ocotillo Formations: Evidence for  
 879 Initial Strike-Slip Deformation along the San Felipe and San Jacinto Fault Zones,  
 880 Southern California, *J. of Geology*, 115, 43–62, 2007.
- 881 Leever, K., Gabrielsen, R. H., Sokoutis, D. and Willingshofer, E.: The effect of convergence  
 882 angle on the kinematic evolution of strain partitioning in transpressional brittle wedges:  
 883 Insight from analog modeling and high-resolution digital image analysis, *Tectonics*, 30,  
 884 2011a.
- 885 Leever, K., Gabrielsen, R. H., Faleide, J. I. and Braathen, A.: A transpressional origin for the  
 886 West Spitsbergen fold- and thrust belt: Insight from analog modeling, *Tectonics*, 30, 1–  
 887 24, 2011b.
- 888 Lin, G.: Three-Dimensional Seismic Velocity Structure and Precise Earthquake Relocations  
 889 in the Salton Trough, Southern California, *BSSA*, 103, 5, 2694–2708, 2013.
- 890 Lin, G., Schearer, P. M. and Hauksson, E.: Applying a three-dimensional velocity model,  
 891 waveform cross correlation, and cluster analysis to locate southern California  
 892 seismicity from 1981 to 2005, *J. Geophys. Res.*, 112, B12309, 2007.
- 893 Lindsey, E. O. and Fialko, Y.: geodetic slip rates in the southern San Andreas Fault system:  
 894 Effects of elastic heterogeneity and fault geometry, *J. Geophys. Res.*, 118, 689–697,  
 895 2013.
- 896 Lutz, A. T., Dorsey, R. J., Housen, B. A. and Janecke, S. U.: Stratigraphic record of  
 897 Pleistocene faulting and basin evolution in the Borrego Badlands, San Jacinto fault  
 898 zone, Southern California, *GSA Bull.*, 118, 11/12, 1377–1397, 2006.
- 899 Markowski, D. K.: Confirmation of a New Geometric and Kinematic Model of the San  
 900 Andreas Fault at Its Southern Tip, Durmid Hill, Southern California, Master's Thesis,  
 901 Utah State University, Logan, USA, 151 pp., 2016.
- 902 Matti, J. C., Morton, D. M. and Cox, B. F.: Distribution and geologic relations of fault  
 903 systems in the vicinity of the Central Transverse Ranges, southern California, USGS  
 904 Report, 85-365, 31 pp., 1985.
- 905 McClay, K. R., Whitehouse, P. S., Dooley, T. and Richards, M.: 3D evolution of fold and thrust  
 906 belts formed by oblique convergence, *Mar. Petrol. Geol. Bull.*, 21, 857–877, 2004.
- 907 McNabb, J. C.: Stratigraphic record of Pliocene-Pleistocene basin evolution and deformation  
 908 along the San Andreas fault, Mecca Hills, California, Unpublished Master's Thesis,  
 909 University of Oregon, 70 pp., 2013.

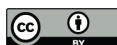

- 910 McNabb, J. C., Dorsey, R. J., Housen, B. A., Dimitroff, C. and Messé, G. T.: Stratigraphic  
 911 record of Pliocene–Pleistocene basin evolution and deformation within the Southern  
 912 San Andreas Fault Zone, Mecca Hills, California, *Tectonophys.*, 719–720, 66–85,  
 913 2017.
- 914 Miller, D.D.: Distributed shear, rotation, and partitioned strain along the San Andreas fault,  
 915 central California, *Geology*, 26, 867–870, 1998.
- 916 Morton, D., Matti, J. and Tinsley, J.: Banning fault, Cottonwood canyon, San Gorgonio pass,  
 917 southern California, in: *Cordilleran Section of the Geological Society of America*,  
 918 edited by: Hill, M., 191–192, *Geol. Soc. of Am.*, Boulder, Colorado, USA, 1987.
- 919 Mount, V. S. and Suppe, J.: State of stress near the San Andreas fault: implications for wrench  
 920 tectonics, *Geology*, 15, 1143–1146, 1987.
- 921 Nicholson, C., Hauksson, E. and Plesch, A.: Revised 3D Fault Models for the Southern San  
 922 Andreas Fault System Extending from San Gorgonio Pass to the Salton Sea, 106<sup>th</sup>  
 923 Annual Meeting AAPG, 27<sup>th</sup>–29<sup>th</sup> May, 2010.
- 924 Nur, A., Hagai, R. and Beroza, G. C.: The Nature of the Landers-Mojave Earthquake Line,  
 925 *Science*, 261, 201–203, 1993a.
- 926 Nur, A., Hagai, R. and Beroza, G. C.: Landers-Mojave earthquake Line: A New Fault System?,  
 927 *GSA Today*, 3, 10, 255–258, 1993b.
- 928 Parrish, J.G.: Geological compilation of Quaternary surficial deposits in southern California,  
 929 Palm Springs 30' x 60' quadrangle, CGS Special Report 217, Plate 24, 1983. 
- 930 Platt, J. P. and Passchier, C. W.: Zipper junctions: A new approach to the intersections of  
 931 conjugate strike-slip faults, *Geology*, 44, 10, 795–798, 2016. 
- 932 Rymer, M. J.: Quaternary Fault-Normal Thrusting in the Northwestern Mecca Hills, Southern  
 933 California, *GSA Cordilleran Section Guidebook*, Trip 15, 268–272, 1994.
- 934 Sanderson, D. J. and Marchini, W. R. D.: Transpression, *J. Structural Geol.*, 6, 5, 449–458,  
 935 1984.
- 936 Sarna-Wojcicki, A. M., Pringle, M. S. and Wijbrans, J.: New <sup>40</sup>Ar/<sup>39</sup>Ar age of the Bishop Tuff  
 937 from multiple sites and sediment rate calibration for the Matuyama-Brunhes boundary,  
 938 *J. Geophys. Res.*, 105, B9, 21431–21443, 2000.
- 939 Schlische, R. W.: Geometry and origin of fault-related folds in extensional settings, *AAPG*  
 940 *Bull.*, 79, 1661–1678, 1995.
- 941 Schultz, R. A. and Balasko, C. M.: Growth of deformation bands into echelon and ladder  
 942 geometries, *Geophys. Res. Lett.*, 30, 2033, 2003.



- 943 **Sheridan, J. M. and Weldon II, R. J.: Accomodation of compression in the Mecca Hills,**  
 944 California, GSA Cordilleran Section Guidebook, Trip 15, 273–279, 1994.
- 945 **Sheridan, J. M., Weldon II, R. J., Thornton, C. A. and Rymer, M. J.: Stratigraphy and**  
 946 Deformational History of the Mecca Hills, Southern California, GSA Cordilleran  
 947 Section Guidebook, Trip 15, 262–268, 1994.
- 948 **Spinler, J. C., Bennett, R. A., Anderson, M. L., McGill, S. F., Hreinsdottir, S. and McCallister,**  
 949 A.: Present-day strain accumulation and slip rates associated with southern San Andreas  
 950 and eastern California shear zone faults, J. Geophys. Res., 115, B11407, 2010.
- 951 **Spotila, J. A., Niemi, N., Brady, R., House, M., Buscher, J and Oskin, M.: Long-term**  
 952 continental deformation associated with transpressive plate motion: The San Andreas  
 953 fault, Geology, 35, 11, 967–970, 2007.
- 954 **Sylvester, A. G.: Strike-slip faults, GSA Bull., 100, 1666–1703, 1988.**
- 955 **Sylvester, A. G. and Smith, R. R.: Tectonic Transpression and Basement-Controlled**  
 956 Deformation in San Andreas Fault Zone, Salton Trough, California, Treatise of  
 957 Petroleum Geology, 60, 12, 2081–2102, 1976.
- 958 **Sylvester, A. G. and Smith, R. R.: Structure section in Painted Canyon, Mecca Hills, southern**  
 959 California, GSA Centennial Field Guide, Cordilleran Section, 103–108, 1987.
- 960 **Sylvester, A. G., Bilham, R., Jackson, M. and Barrientos, S.: Aseismic Growth of Durmid**  
 961 Hill, Southeasternmost San Andreas Fault, California, J. Geophys. Res., 98, B8,  
 962 14233–14243, 1993.
- 963 **Titus, S. J., Housen, B. and Tikoff, B.: A kinematic model for the Rinconada fault system in**  
 964 central California based on structural analysis of en echelon folds and paleomagnetism,  
 965 J. Struct. Geol., 29, 961–982, 2007.
- 966 **Thatcher, W., Savage, J. C. and Simpson, R. W.: The Eastern California Shear Zone as the**  
 967 northward extension of the southern San Andreas Fault, J. Geophys. Res., Solid Earth,  
 968 121, 2904–2914, 2016.
- 969 **Tyley, S. J.: Analog model study of the ground-water basin of the upper Coachella Valley,**  
 970 California, U.S. Geological Survey Water-Supply, 2027, 1974.
- 971 **Winker, C. D. and Kidwell, S. M.: Stratigraphy of a marine rift basin: Neogene of the western**  
 972 Salton Trough, California, in: Field Conference Guide, edited by: Abbott, P. L. and  
 973 Cooper, J. D., AAPG National Convention, San Diego, California, USA, 295–336,  
 974 1996.
- 975 **Zeeden, C., Rivera, T. A. and Storey, M.: An astronomical age for the Bishop Tuff and**  
 976 concordance with radioisotopic dates, Geophys. Res. Lett., 41, 3478–3484, 2014.
